# Supplementary material for: p38 mitogen-activated protein kinase determines the susceptibility to cigarette smoke-induced emphysema in mice
Source: PubMed Central journal article supplement (PMC4024315; doi:10.1186/1471-2466-14-79), 2014-05-07

# Supplementary Figure 1

## A

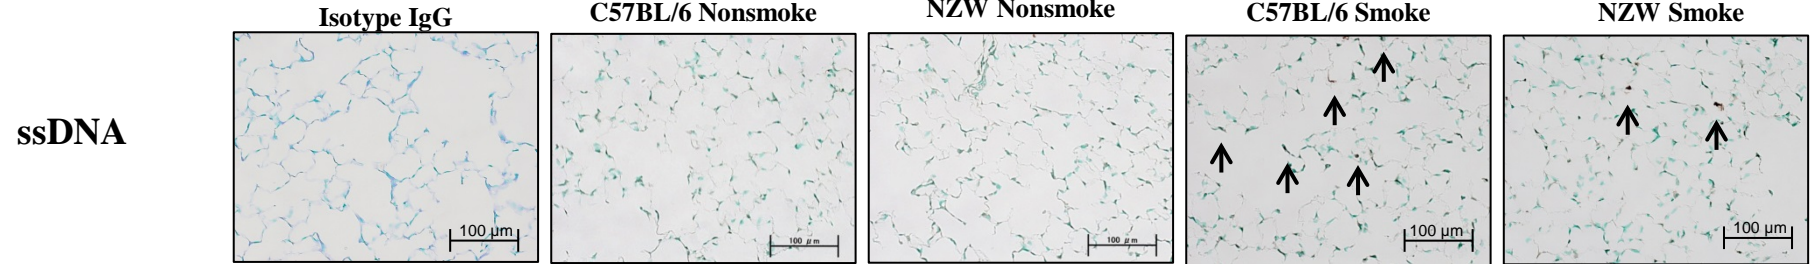

## B

Cleaved caspase-3

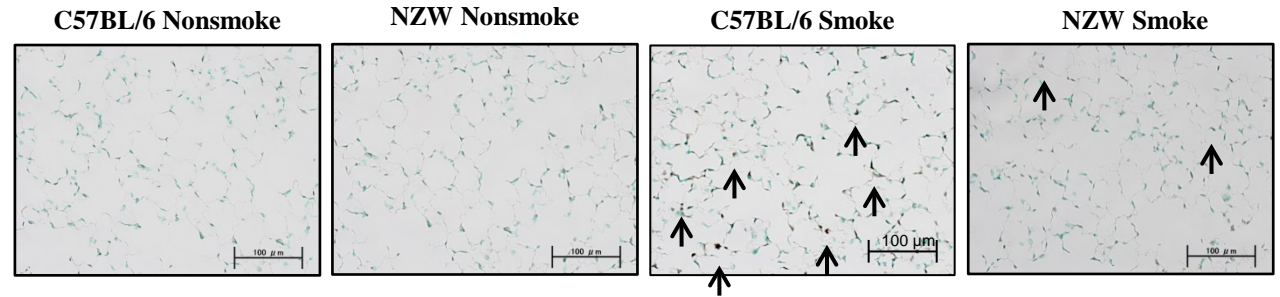

## C

PAS

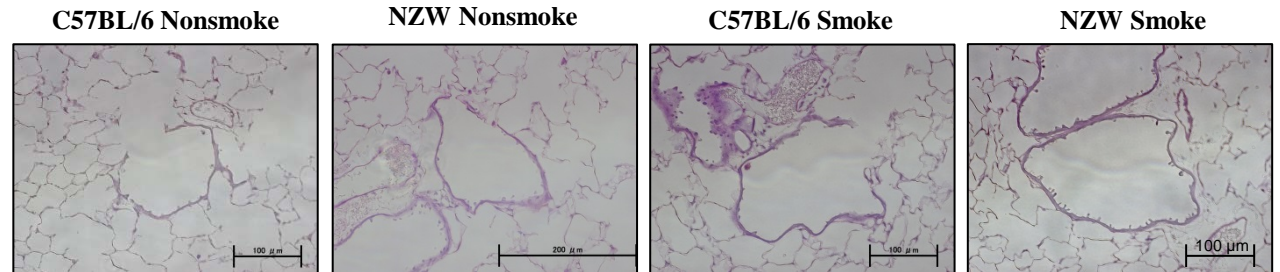

# Supplementary Figure 2

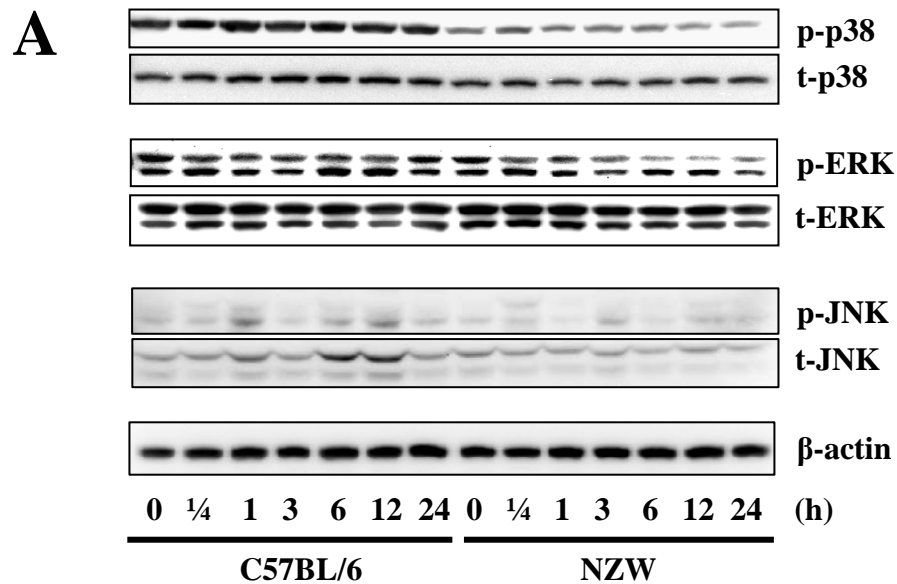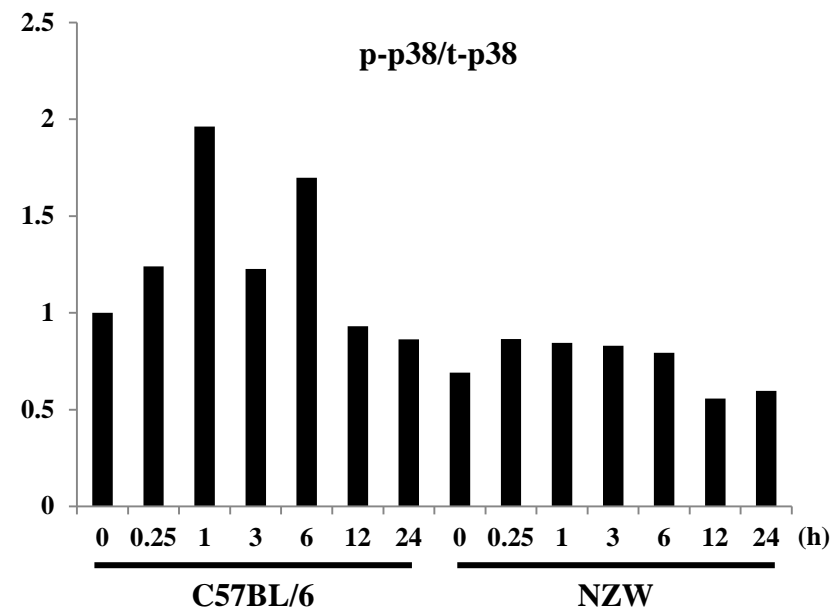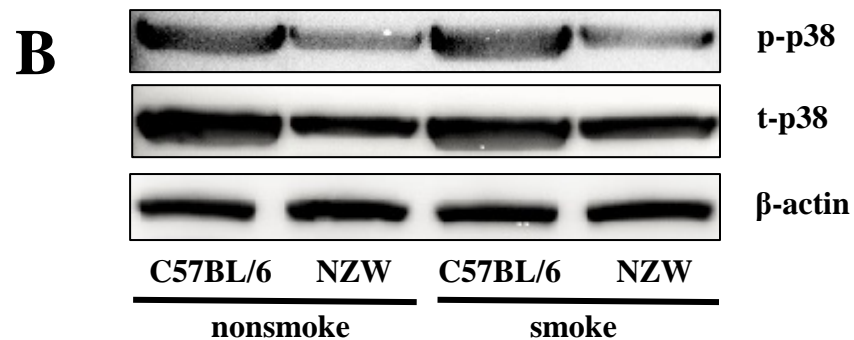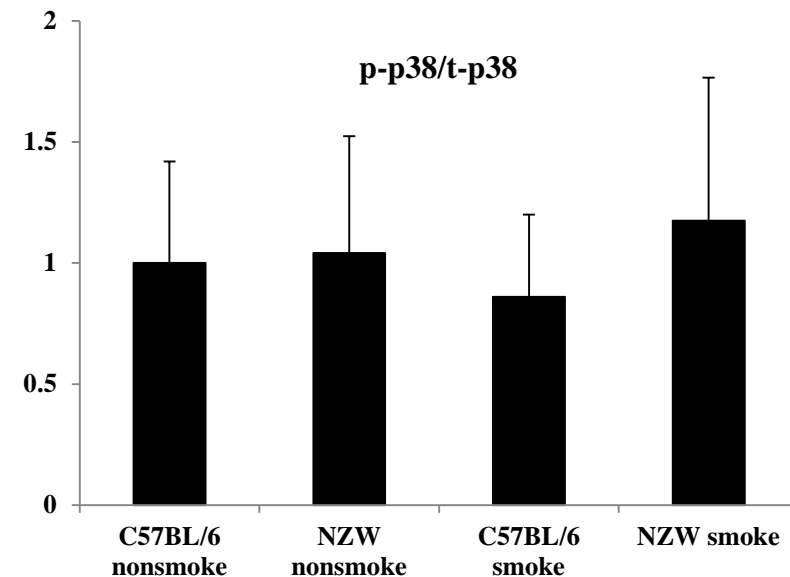

# Supplementary Figure 2 (continued)

## C

p-p38 (acute CS)

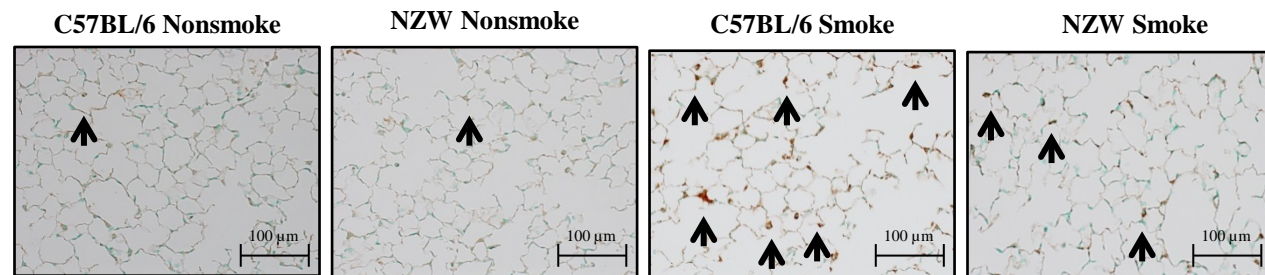

## D

p-p38 (chronic CS)

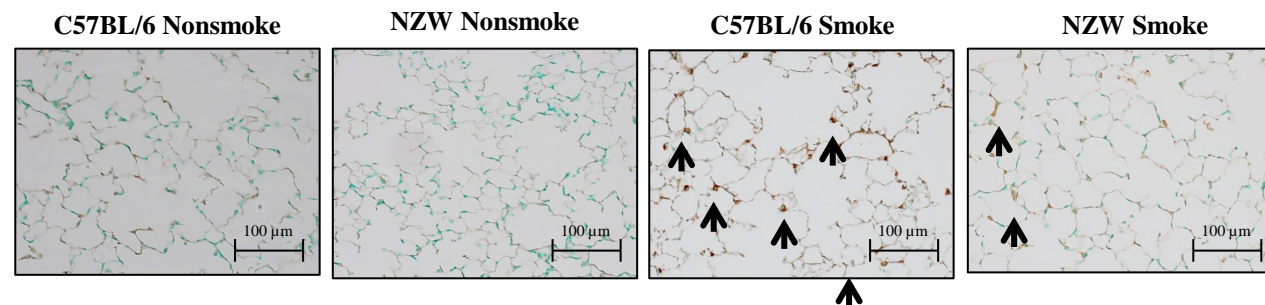

## E

p38 MAPK mRNA (acute CS)

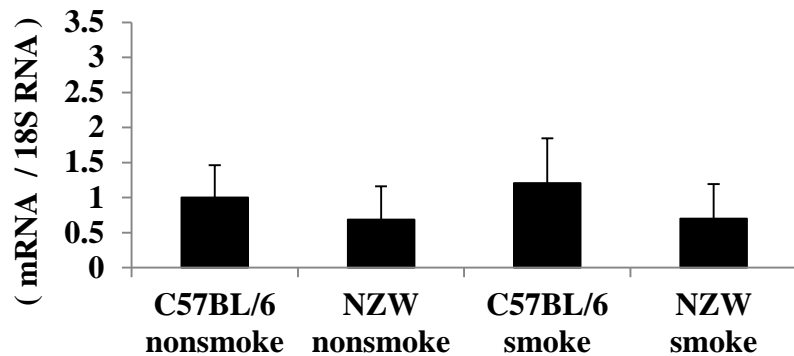

## F

MAPKAPK-2 mRNA (acute CS)

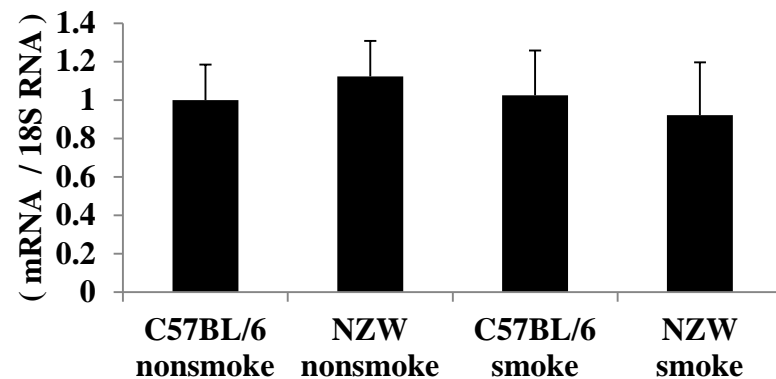

# Supplementary Figure 2 (continued)

## G

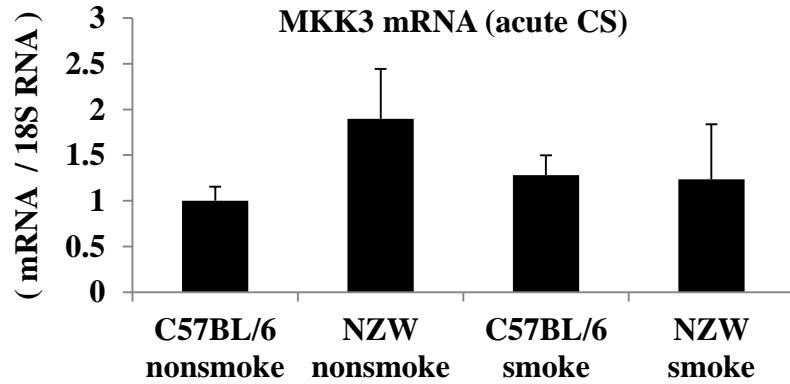

## H

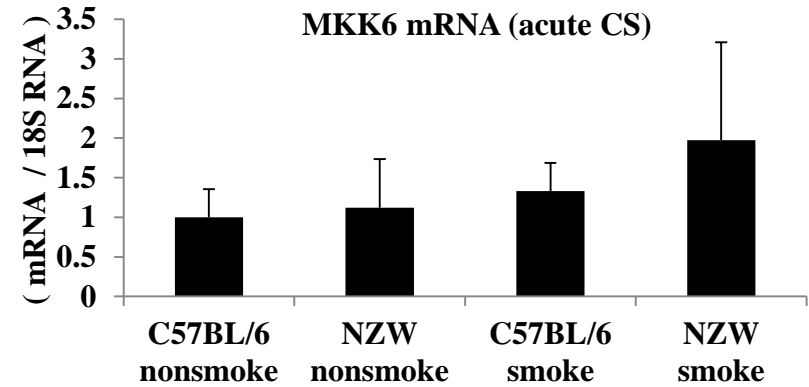

## I

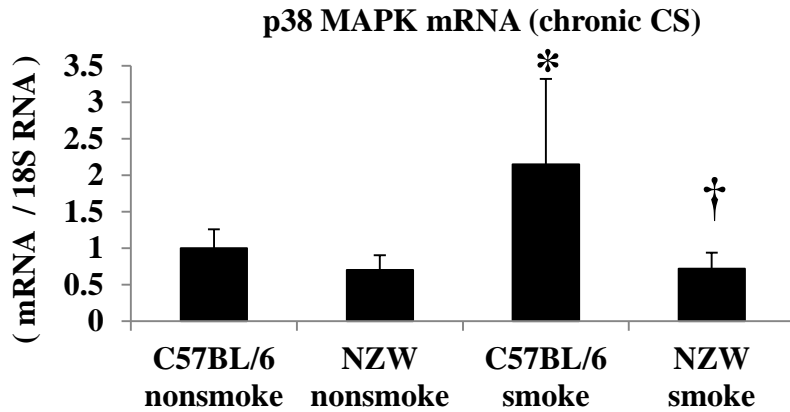

# Supplementary Figure 3

## A

ssDNA

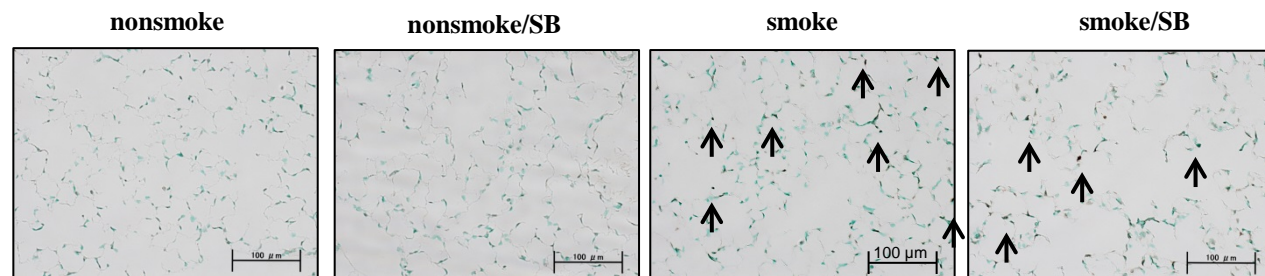

## B

Cleaved caspase-3

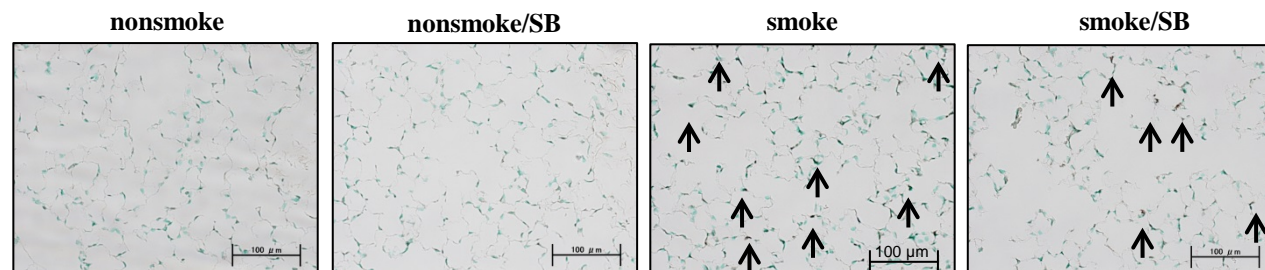

## C

PAS

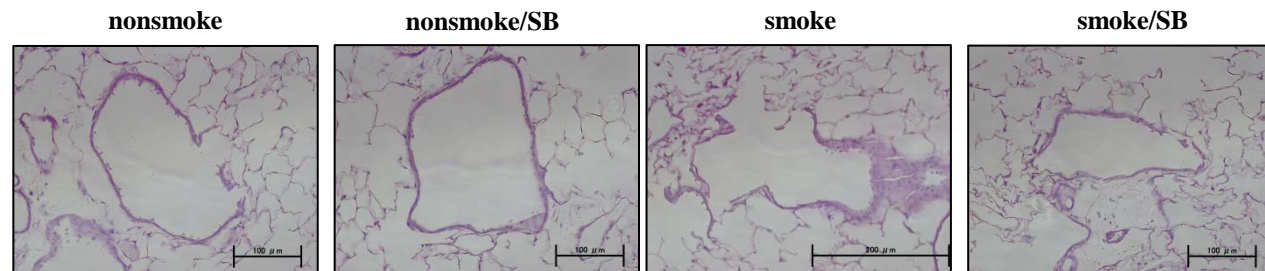

# Supplementary Figure 4

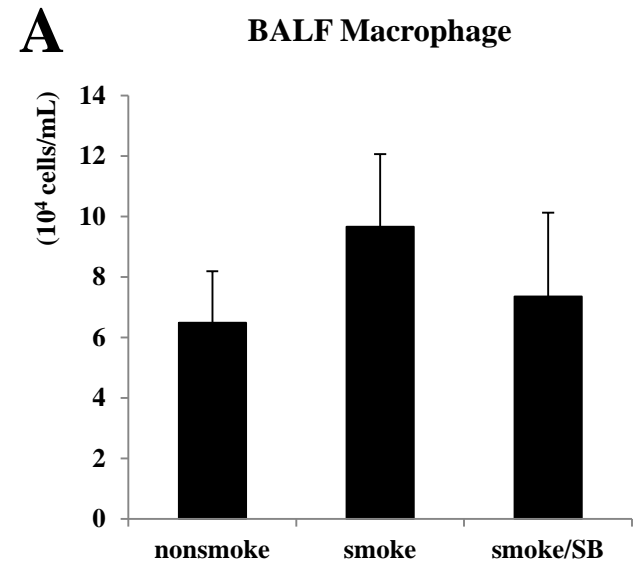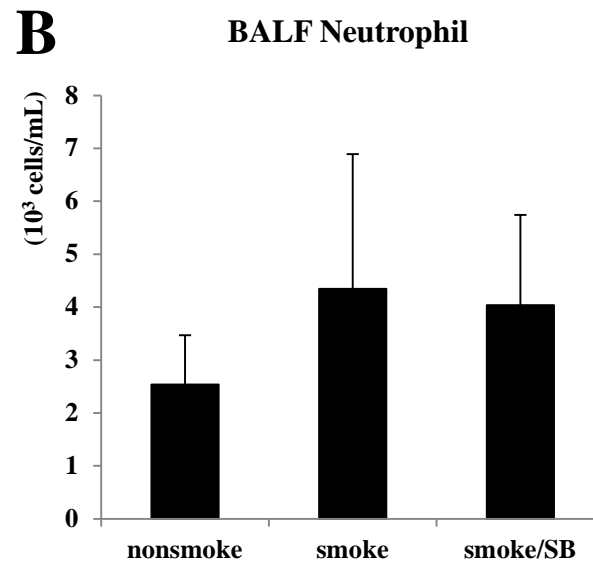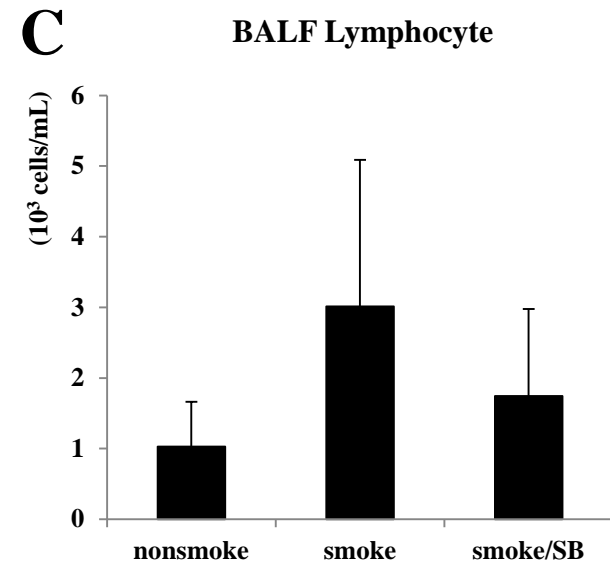

Supplement: 1471-2466-14-79-S1.pdf [file 1471-2466-14-79-S1.pdf]
